# Supplementary material for: IL-6R/STAT3/miR-204 feedback loop contributes to cisplatin resistance of epithelial ovarian cancer cells
Source: PubMed Central journal article supplement (PMC5503602; doi:10.18632/oncotarget.16610), 2017-03-27
Supplement: oncotarget-08-39154-s001.pdf [file oncotarget-08-39154-s001.pdf]

## IL-6R/STAT3/miR-204 feedback loop contributes to cisplatin resistance of epithelial ovarian cancer cells

### SUPPLEMENTARY MATERIALS

#### Cell culture

Cells were cultured in DMEM supplemented with 10% fetal calf serum (Gibco BRL, Grand Island, NY), 100 U/mL penicillin and 100 µg/mL streptomycin in a humidified atmosphere containing 5% CO<sub>2</sub> at 37°C.

#### Transfection

Cells were seeded into 6-well plates (6×10<sup>5</sup> cells/well) and transfected with miR-204 mimic (5'-UUCUUUGUCAUCCUAUGCCU-3', 5'-GCAUAGGAUGACAAAGGGAAUU-3') or inhibitor (INH, 5'-AGGCAUAGGAUGACAAAGGGAA-3') and their negative controls (mimic-NC, 5'-UUCUCCGAACGUGUCACGUTT-3', 5'-ACGUGACACGUUCGGAGAATT-3' and INH-NC, 5'-CAGUACUUUUGUGUAGUACAA-3', respectively) (all transcripts from Gene Pharma Company, Shanghai, China) at a final concentration of 100 nM using Lipofectamine 2000 (Invitrogen, CA, USA). IL-6R siRNA (siIL-6R, sense: 5'-GCAGGCACUUACUACUAAUTT-3', antisense: 5'-AUUAGUAGUAAGUGCCUGCTT-3'), STAT3 siRNA (siSTAT3, sense: 5'-GGGACCUGGUGUGAAUUAUTT-3', antisense: 5'-AUAAUUCACACCAGGUCCCTT-3'), and negative control siRNA (siNC, 5'-UUCUCCGAACGUGUCACGUTT-3') were obtained from Qiagen, Inc. (Valencia, CA, USA). The recombinant plasmid eukaryotic expression vector pcDNA3.1-IL-6R (IL-6R) and the empty vector control (vector) were purchased from Cell Signaling Technology, Inc. (Beverly, USA). siIL-6R, siSTAT3, siCont, IL-6R or vector were transfected into cells using Lipofectamine 2000 according to the manufacturer's protocol.

#### Reverse transcription quantitative real-time PCR

Total RNA was extracted from cells or the tissue samples using TRIzol (Invitrogen, Inc., Carlsbad, CA), and cDNA was generated using the PrimeScript® RT Reagent Kit (Takara Co., Ltd., Dalian, China). A quantitative real-time PCR (qRT-PCR) assay was performed to evaluate mature miRNAs and mRNA expression using the SYBR Premix Ex Taq™ II (Takara Co., Ltd., Dalian, China). The relative expression levels

of each sample were measured using the 2<sup>-ΔΔCT</sup> method. The primers were as follows: miR-204, forward primer (FW): 5'-GGGCTTCCCTTTGTCATCCT-3', reverse primer (RV): 5'-GTGCAGGGTCCGAGGT-3'. IL-6R FW: 5'-TTGTTTGTGAGTGGGGTCC-3', RV: 5'-TGGGACTCCTGGGAATACTG-3', STAT3: FW: 5'-GGGAAGAATCACGCCTTCTAC-3', RV: 5'-ATCTGCTGCTTCTCCTGTCAC-3'. IL-6: FW: 5'-CAATCTGGATTCAATGAGGAGAC-3', RV: 5'-CTCTGGCTTGTTCCTCACTACTC-3'. Bcl-2: FW: 5'-GGTCATGTGTGTGGAGAGC-3', RV: 5'-GATCCAGGTGTGCAGGTG-3'. Survivin: FW: 5'-AGCCCTTCTCAAGGACCAC-3' RV: 5'-GCACTTCTCCGCAGTTTCC-3'. Bax: FW: 5'-GTTTCATCCAGGATCGAGC-3', RV: 5'-GGAAGTCCAATGTCCAGC-3'. Mcl-1: FW: 5'-GTAAGGACAAAACGGGAC-3', RV: 5'-CTCTTCAATCAATGGGGA-3'. β-actin FW: 5'-GCTTCTCCTTAATGTCACGC-3', RV: 5'-CCCACACTGTGCCCATCTAC-3'. The relative levels of miRNA and mRNA were normalized to U6 snRNA and β-actin, respectively.

#### Luciferase reporter assays

The putative target sites of the human IL-6R 3'UTR segments for miR-204 were amplified using Pyrobest DNA polymerase (Fermentas, CA) and then cloned into the Xba I site of the pGL3 control plasmid (Promega, Madison, USA). The pRL-TK Vectors expressing Renilla luciferase was used as a control vector. miR-204 binding sites in the IL-6R 3'UTR were amplified by PCR with the following primers: IL-6R 3'UTR FW, 5'-GTTTTCCACTGTGGGCTTGT-3', and RV, 5'-TACTGACCCTTTGCCCCATA-3'. The respective mutated putative miR-204 binding site in the IL-6R 3'UTR (Mut-IL-6R 3'UTR) was generated using the QuickChange Site-Directed Mutagenesis Kit (Stratagene, Cedar Creek, USA) according to the manufacturer's protocol. For reporter assays, HEK293, A2780 and SKOV3 cells were transiently cotransfected with the pRL-TK Vectors (Promega), wild-type or mutant 3'UTR of IL-6R and miR-204 mimic or mimic-NC by Lipofectamine 2000. The firefly and Renilla luciferase activities were measured consecutively using the Dual-Luciferase Reporter assay system (Promega). The luminescence intensity of firefly luciferase was normalized to that of Renilla luciferase.

**ELISA assay**

This sandwich ELISA assay (cat.no 171-V22552, Bio-rad, USA) assessed the phosphorylation status of

tyrosine 705 of STAT3 protein in EOC cells according to instructions. IL-6 levels in EOC cells was evaluated by ELISA assay (R&D Systems, cat. no D6050, USA) following the manufacturer's protocol.

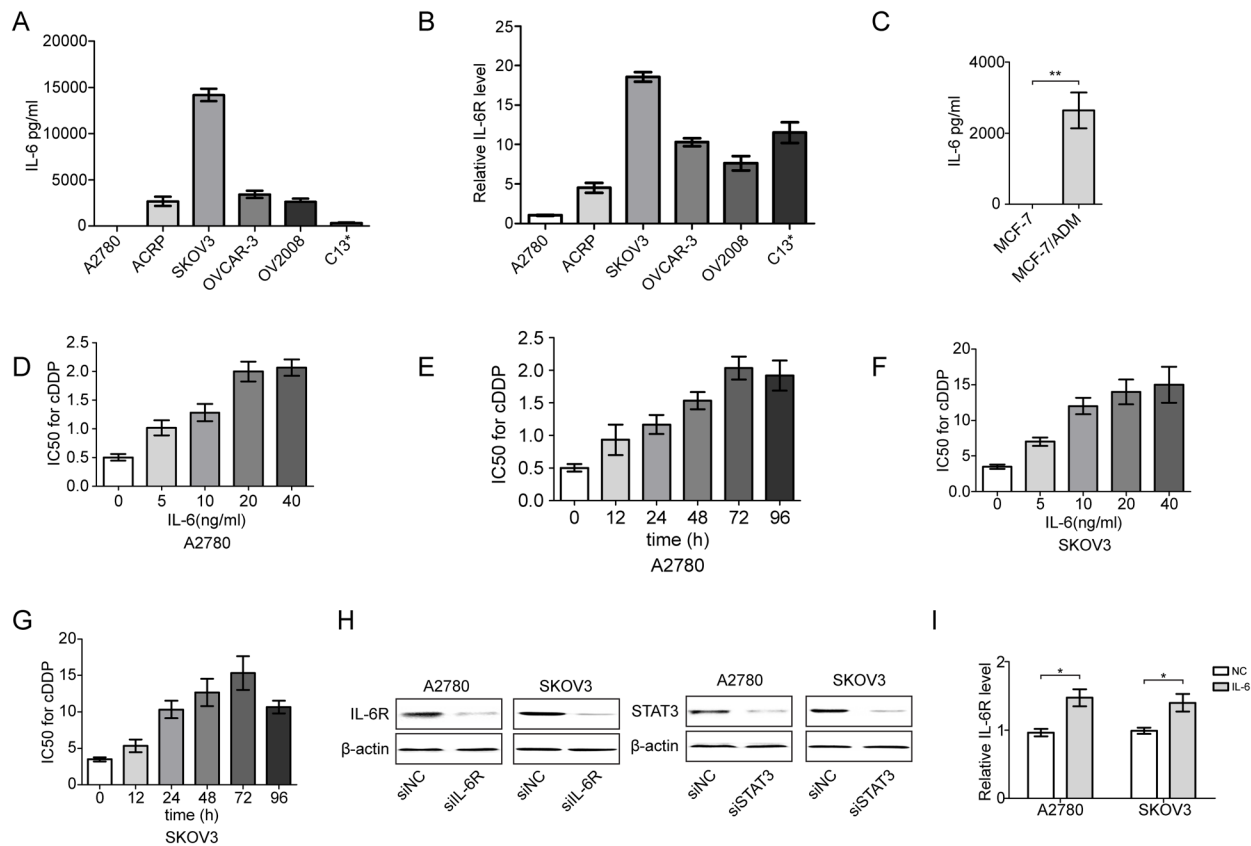

**Supplementary Figure 1: IL-6 induces cDDP resistance of EOC cells.** (A) IL-6 expression level in EOC cells evaluated by ELISA. (B) Relative IL-6R mRNA levels in EOC cells. (C) IL-6 expression in ADM-sensitive and ADM-resistant breast cancer cell lines. (D) IC50 for cDDP in A2780 cells treated with an increasing concentration of IL-6. (E) IC50 for cDDP in A2780 cells treated with IL-6 (20 ng/ml) at different time points. (F) IC50 for cDDP in SKOV3 cells treated with an increasing concentration of IL-6. (G) IC50 for cDDP in SKOV3 cells treated with IL-6 (20 ng/ml) at different time points. (H) The protein levels of IL-6R or STAT3. (I) Changes in IL-6R mRNA expression in EOC cells after IL-6 treatment. \* $P < 0.05$ , \*\* $P < 0.01$ .

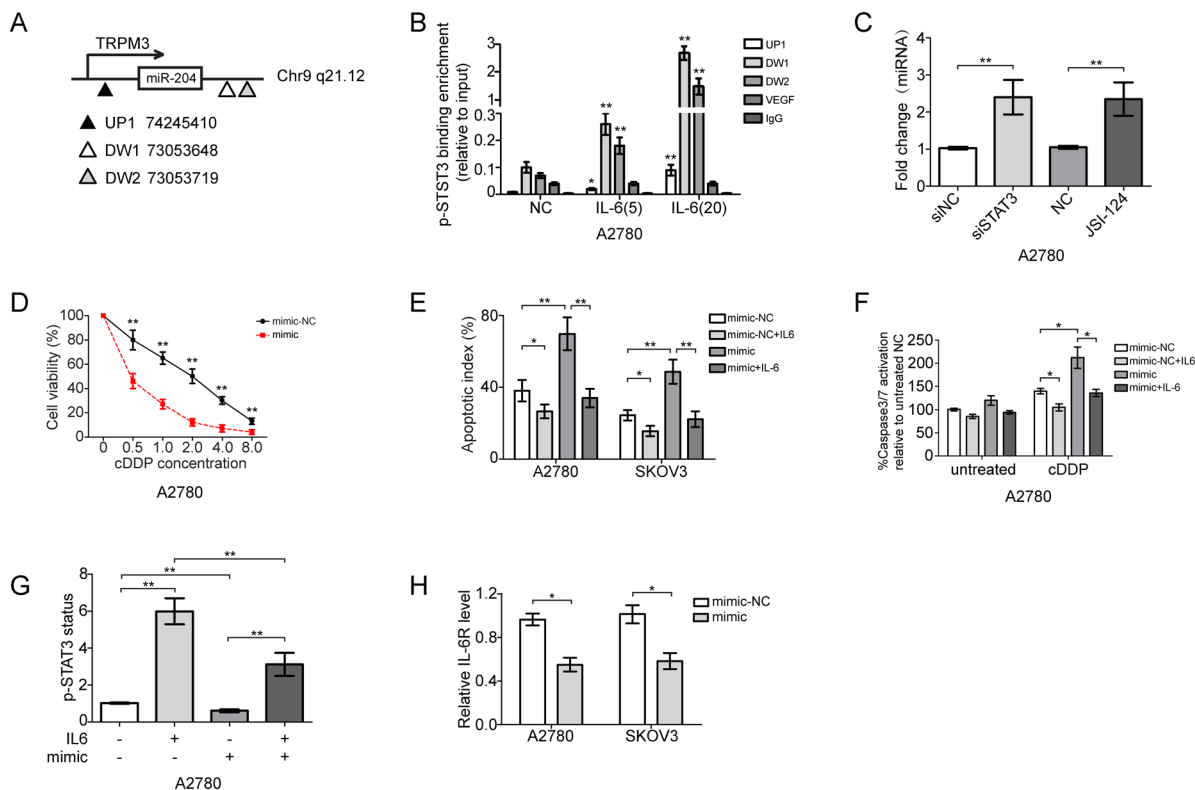

**Supplementary Figure 2: IL-6 induces cDDP resistance of EOC cells through direct repression of miR-204 by STAT3.** (A) Schematic representation of the miR-204 locus and its host gene, TRPM3. STAT3-binding sites around the TRPM3 start site (UP1, DW1 and DW2) were predicted by an in silico analysis. (B) ChIP analysis of STAT3 occupancy (fold enrichment) at the TRPM3/miR-204 locus in A2780 cells treated with vehicle or IL-6. (C) qRT-PCR analysis of miR-204 in A2780 cells treated with siSTAT3 or JSI-124 (5 µg/ml) for 24 h and subsequently treated with IL-6 for 72 h. EOC cells were treated with mimic for 24 hours and subsequently treated with IL-6 for 72 h, and cell viability (D), cell apoptosis (E), and caspase 3/7 activation (F) were measured in EOC cells. (G) STAT3 phosphorylation status (Tyr 705) assessed by ELISA in A2780 cells. (H) Changes in IL-6R mRNA expression in IL-6-treated EOC cells in response to miR-204 expression. \**P* < 0.05, \*\**P* < 0.01.

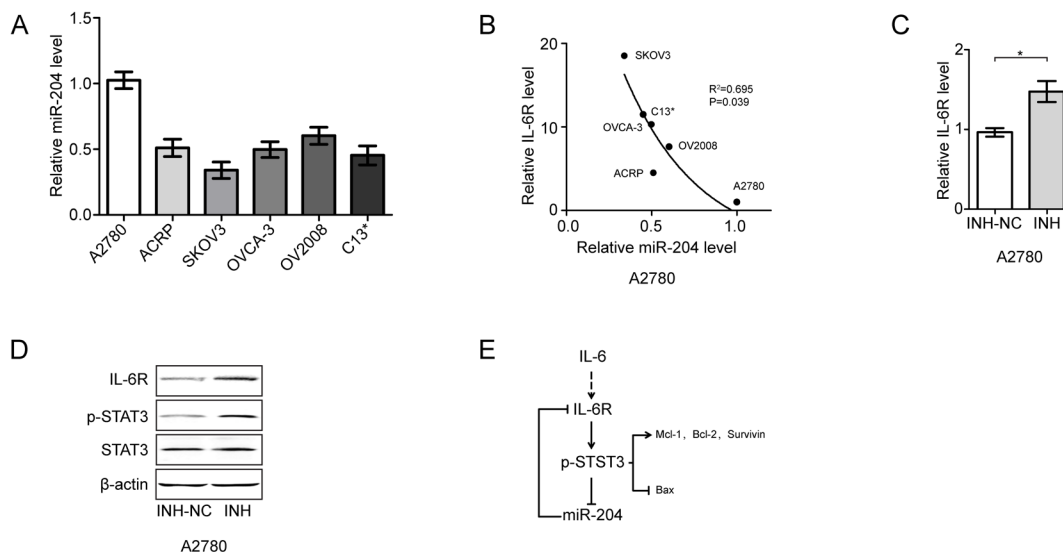

**Supplementary Figure 3: miR-204 targeting of IL-6R in EOC cells.** (A) Relative miR-204 levels in EOC cells. (B) miR-204 and IL6R levels in the indicated cell lines and a correlation coefficient (r) are shown. (C) Relative IL-6R mRNA in inhibitor-treated A2780 cells. (D) The protein levels of IL-6R, p-STAT3 and STAT3 in inhibitor-treated A2780 cells. (E) Schematic representation of the proposed IL-6R/STAT3/miR-204 feedback loop. \* $P < 0.05$ , \*\* $P < 0.01$ .

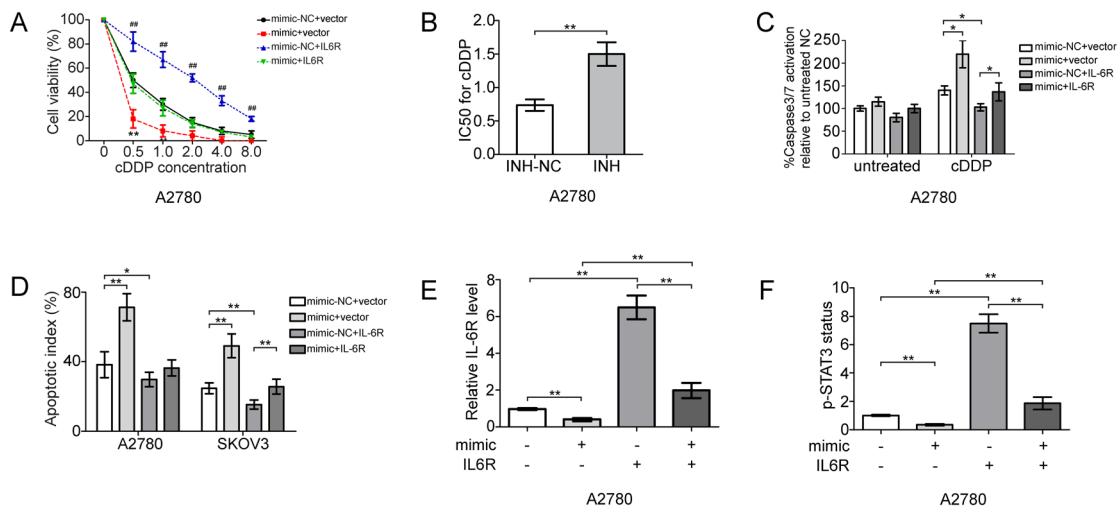

**Supplementary Figure 4: Effect of miR-204 on the cDDP sensitivity of EOC cells.** A2780 cells were transfected with mimic-NC and empty vector (NC+vector), mimic-NC and IL-6R recombinant plasmid (NC+IL-6R), miR-204 mimic and empty vector (mimic+vector), or miR-204 mimic and IL-6R recombinant plasmid (mimic+IL-6R). After transfection, the change in the cell viability (A), IC50 for cDDP (B), Caspase 3/7 activation (C) and cell apoptosis (D) were analyzed. (E) Changes in IL-6R mRNA expression in A2780 cells. (F) STAT3 phosphorylation status (Tyr 705) assessed by ELISA in A2780 cells. \* $P < 0.05$ , \*\* $P < 0.01$ .

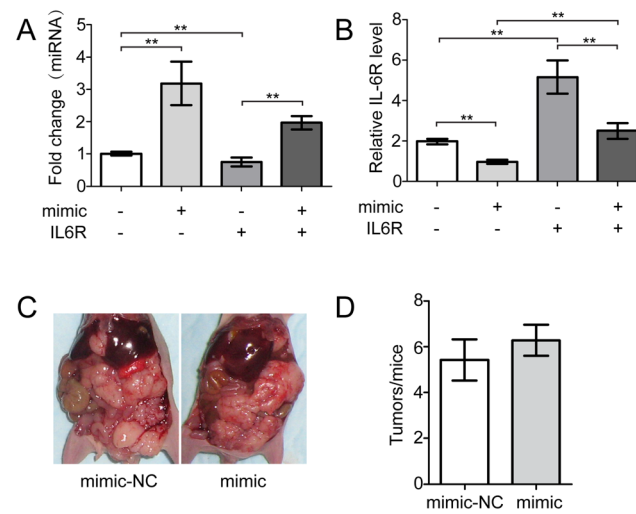

**Supplementary Figure 5: Effect of miR-204 on tumor growth *in vivo*.** SKOV3 cells transfected with mimic-NC or mimic were intraperitoneally injected into BALB/c nude mice, n=6 per group. **(A)** Relative miR-204 level in SKOV3 xenograft tumors. **(B)** Relative IL-6R mRNA level in SKOV3 xenograft tumors. **(C)** The gross morphology of tumors in nude mice 35 days after tumor cell injection. **(D)** Tumor incidence in indicated mice. \* $P < 0.05$ , \*\* $P < 0.01$ .

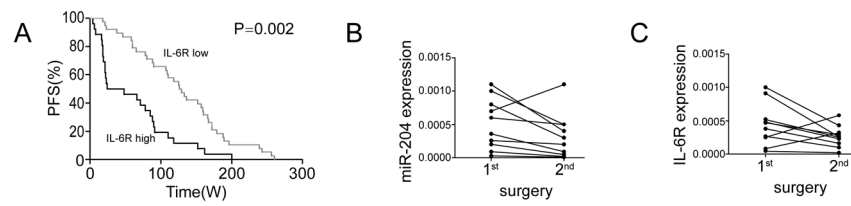

**Supplementary Figure 6:** (A) A Kaplan-Meier analysis of the PFS of ovarian cancer patients with the corresponding expression profiles of IL-6. Difference in miR-204 (B) and IL-6R (C) expression between the first (1<sup>st</sup>) and second (2<sup>nd</sup>) surgery as quantified in 10 patients.



**Supplementary Table 1: Clinicopathological characteristics of OC patients with either high or low miR-204 expression. (N= 64)**

|           |          | miR-204 low | miR-204 high |
|-----------|----------|-------------|--------------|
| Age (yrs) |          | 53.25±7.99  | 55.01±8.16   |
| Stage     | IIIC     | 26(40.63%)  | 28 (43.75%)  |
|           | IV       | 6(9.38%)    | 4(6.25%)     |
| Grade     | High     | 3(4.69%)    | 2(3.13%)     |
|           | Moderate | 9(14.06%)   | 7(10.94%)    |
|           | Low      | 23 (39.94%) | 20(31.25%)   |

**Supplementary Table 2: Primers used for quantitative real-time PCR**

| <b>mRNA</b> | <b>Forward primer</b>          | <b>Reverse primer</b>          |
|-------------|--------------------------------|--------------------------------|
| TRPM3 U1    | 5'-AACTCATCCCTGGAAGCAAAGTGC-3' | 5'-TTTGGCCTCAAGGAAGCAAAGTGC-3' |
| TRPM3 D1    | 5'-ATGTTCCAGGAAGAGGGAACAGCA-3' | 5'-TTCTACCCAGAACCTTCCTTCCCA-3' |
| TRPM3 D2    | 5'-AAGGAAGTGACTCACAGGAAGGCA-3' | 5'-GGCTTGCTGTTGCCCTTGGATAAA-3' |
| VEGF        | 5'-CATACGTGGGCTCCAACAGG-3'     | 5'-CGGAGAAGCTGTGTGGTTCCG-3'    |
